# Supplementary material for: Hypertensive Disorders during Pregnancy and Anthropometric Measurement of Children up to 7 Years of Age: The Hokkaido Birth Cohort Study in Japan
Source: MDPI journal article supplement (doi:10.3390/ijerph182010951), 2021-10-18
Supplement: s1 [file s1]

**Table S1.** Association between hypertensive disorders during pregnancy and body mass index during different years of ages.

| Year   | Outcome     | Exposure | All                 |                      | Male                 |                      | Female              |                     |
|--------|-------------|----------|---------------------|----------------------|----------------------|----------------------|---------------------|---------------------|
|        |             |          | Crude               | Adjusted             | Crude                | Adjusted             | Crude               | Adjusted            |
|        |             |          | $\beta$ (95% CI)    | $\beta$ (95% CI)     | $\beta$ (95% CI)     | $\beta$ (95% CI)     | $\beta$ (95% CI)    | $\beta$ (95% CI)    |
| Birth  | BMI         | Non-HDP  | Reference           | Reference            | Reference            | Reference            | Reference           | Reference           |
|        |             | HDP      | 0.06 (-0.09, 0.21)  | 0.06 (-0.09, 0.22)   | 0.02 (-0.19, 0.22)   | -0.004 (-0.22, 0.21) | 0.10 (-0.13, 0.32)  | 0.14 (-0.09, 0.37)  |
| 1 year | BMI         | Non-HDP  | Reference           | Reference            | Reference            | Reference            | Reference           | Reference           |
|        |             | HDP      | -0.02 (-0.27, 0.23) | -0.014 (-0.27, 0.24) | -0.09 (-0.44, 0.25)  | -0.04 (-0.40, 0.33)  | 0.04 (-0.32, 0.40)  | 0.012 (-0.35, 0.38) |
| 2 year | BMI         | Non-HDP  | Reference           | Reference            | Reference            | Reference            | Reference           | Reference           |
|        |             | HDP      | -0.08 (-0.59, 0.42) | -0.08 (-0.63, 0.46)  | 0.02 (-0.47, 0.53)   | 0.06 (-0.49, 0.60)   | -0.21 (-1.11, 0.69) | -0.25 (-1.19, 0.70) |
| 4 year | BMI         | Non-HDP  | Reference           | Reference            | Reference            | Reference            | Reference           | Reference           |
|        |             | HDP      | -0.10 (-0.31, 0.11) | -0.04 (-0.26, 0.17)  | -0.003 (-0.27, 0.27) | 0.09 (-0.19, 0.37)   | -0.20 (-0.52, 0.12) | -0.17 (-0.49, 0.16) |
| 7 year | BMI         | Non-HDP  | Reference           | Reference            | Reference            | Reference            | Reference           | Reference           |
|        |             | HDP      | 0.27 (-0.09, 0.63)  | 0.32 (-0.04, 0.69)†  | 0.57 (0.04, 1.11)*   | 0.56 (0.03, 1.10)*   | -0.05 (-0.53, 0.44) | -0.04 (-0.53, 0.45) |
| Birth  | BMI z score | Non-HDP  | Reference           | Reference            | Reference            | Reference            | Reference           | Reference           |
|        |             | HDP      | 0.05 (-0.08, 0.19)  | 0.06 (-0.08, 0.20)   | 0.01 (-0.17, 0.20)   | -0.004 (-0.20, 0.19) | 0.09 (-0.11, 0.29)  | 0.13 (-0.96, -0.50) |
| 1 year | BMI z score | Non-HDP  | Reference           | Reference            | Reference            | Reference            | Reference           | Reference           |
|        |             | HDP      | -0.02 (-0.21, 0.16) | -0.013 (-0.21, 0.18) | -0.6 (-0.32, 0.20)   | -0.03 (-0.30, 0.24)  | 0.02 (-0.25, 0.29)  | 0.003 (-0.27, 0.28) |
| 2 year | BMI z score | Non-HDP  | Reference           | Reference            | Reference            | Reference            | Reference           | Reference           |
|        |             | HDP      | -0.03 (-0.21, 0.15) | -0.012 (-0.20, 0.18) | 0.04 (-0.17, 0.24)   | 0.07 (-0.14, 0.29)   | -0.10 (-0.40, 0.19) | -0.11 (-0.42, 0.19) |
| 4 year | BMI z score | Non-HDP  | Reference           | Reference            | Reference            | Reference            | Reference           | Reference           |
|        |             | HDP      | -0.08 (-0.23, 0.07) | -0.03 (-0.18, 0.12)  | -0.02 (-0.24, 0.19)  | 0.06 (-0.16, 0.28)   | -0.13 (-0.35, 0.08) | -0.11 (-0.33, 0.10) |
| 7 year | BMI z score | Non-HDP  | Reference           | Reference            | Reference            | Reference            | Reference           | Reference           |
|        |             | HDP      | 0.12 (-0.07, 0.30)  | 0.15 (-0.04, 0.34)   | 0.24 (-0.03, 0.51)†  | 0.31 (0.03, 0.60)*   | -0.01 (-0.26, 0.25) | -0.02 (-0.27, 0.23) |

BMI was measured in kg/m<sup>2</sup>. †p<0.1, \* p<0.05; Confidence interval 95%, Adjusted covariates: Age at measurement, mothers age, mothers pre pregnancy BMI, parity, smoking during first trimester, alcohol during first trimester. Sex was excluded from stratified analysis.

**Table S2.** Association between hypertensive disorders during pregnancy and difference in body mass index gain at different age intervals.

|             |                  |          | Total               |                     | Male                |                     | Female              |                     |
|-------------|------------------|----------|---------------------|---------------------|---------------------|---------------------|---------------------|---------------------|
|             |                  |          | Crude               | Adjusted            | Crude               | Adjusted            | Crude               | Adjusted            |
| BMI gain    | Mean score       | Exposure | $\beta$ (95% CI)    |
| Birth-1 yr  | 4.17 $\pm$ 1.87  | Non- HDP | Reference           | Reference           | Reference           | Reference           | Reference           | Reference           |
|             | 4.10 $\pm$ 1.82  | HDP      | -0.07 (-0.34, 0.20) | -0.07 (-0.35, 0.21) | -0.07 (-0.45, 0.30) | -0.01 (-0.40, 0.39) | -0.09 (-0.48, 0.31) | -0.13 (-0.54, 0.27) |
| Birth-2 yr  | 3.69 $\pm$ 3.45  | Non- HDP | Reference           | Reference           | Reference           | Reference           | Reference           | Reference           |
|             | 3.55 $\pm$ 1.51  | HDP      | -0.14 (-0.66, 0.39) | -0.15 (-0.71, 0.41) | -0.01 (-0.55, 0.53) | 0.40 (-0.54, 0.62)  | -0.29 (-1.1, 0.63)  | -0.36 (-1.32, 0.61) |
| Birth- 4 yr | 3.22 $\pm$ 1.53  | Non- HDP | Reference           | Reference           | Reference           | Reference           | Reference           | Reference           |
|             | 3.09 $\pm$ 1.49  | HDP      | -0.13 (-0.38, 0.16) | -0.09 (-0.35, 0.17) | -0.01 (-0.34, 0.32) | 0.10 (-0.25, 0.45)  | -0.26 (-0.64, 0.12) | -0.26 (-0.65, 0.12) |
| Birth-7 yr  | 3.07 $\pm$ 2.18  | Non- HDP | Reference           | Reference           | Reference           | Reference           | Reference           | Reference           |
|             | 3.27 $\pm$ 2.28  | HDP      | 0.20 (-0.20, 0.60)  | 0.24 (-0.17, 0.65)  | 0.48 (-0.10, 1.01)  | 0.61 (0.01, 1.22)*  | -0.09 (-0.63, 0.45) | -0.12 (-0.67, 0.43) |
| 1 yr-2 yr   | -0.51 $\pm$ 3.29 | Non- HDP | Reference           | Reference           | Reference           | Reference           | Reference           | Reference           |
|             | -0.72 $\pm$ 1.06 | HDP      | -0.21 (-0.72, 0.30) | -0.25 (-0.79, 0.28) | -0.03 (-0.59, 0.54) | -0.04 (-0.62, 0.54) | -0.41 (-1.27, 0.45) | -0.43 (-1.33, 0.47) |
| 2 yr -4 yr  | -0.49 $\pm$ 3.38 | Non- HDP | Reference           | Reference           | Reference           | Reference           | Reference           | Reference           |
|             | -0.39 $\pm$ 0.79 | HDP      | 0.10 (-0.46, 0.66)  | 0.14 (-0.46, 0.74)  | 0.02 (-0.18, 0.23)  | 0.06 (-0.16, 0.28)  | 0.17 (-0.95, 1.30)  | 0.24 (-0.93, 1.42)  |
| 4yr- 7yr    | 0.26 $\pm$ 22.6  | Non- HDP | Reference           | Reference           | Reference           | Reference           | Reference           | Reference           |
|             | 0.22 $\pm$ 1.76  | HDP      | -0.03 (-4.27, 4.20) | -0.02 (-4.61, 4.57) | -0.19 (-8.41, 8.02) | -0.05 (-0.92, 9.10) | 0.12 (-0.68, 0.92)  | 0.04 (-0.79, 0.87)  |

BMI was measured in kg/m<sup>2</sup>. \*p<0.05, Adjusted covariates: Age at measurement, sex, mothers age, mothers pre pregnancy BMI, parity, smoking during first trimester, alcohol during first trimester. Sex was excluded from stratified analysis.
